# Supplementary material for: The origins of IgA-secreting cells in the acinar structures of the nasal turbinates
Source: Research Square preprint supplement (doi:10.21203/rs.3.rs-3690682/v1), 2023-12-15
Supplement: Supplementary file 1 [file b07bda14ca6f3f5f6f02f563.xlsx]

## Sheet: table S1
		Antibodies used in flow cytometry
		Name	Dilution	Clone	Manufacturer
		B cell staining
		CD45R/B220-PerCP-Cy5.5	1:400	RA3-6B2	BioLegend 103236
		CD45R/B220-PB	1:400	RA3-6B2	BioLegend 103227
		CD45R/B220-APC	1:400	RA3-6B2	BioLegend 103212
		CD45R/B220-APC-e780	1:400	RA3-6B2	Invitrogen 47-0452-82
		CD38-AF700	1:600	90	Invitrogen 56-0381-82
		CD95/FAS-PE/Cy7	1:600	Jo2	BD Biosciences 557653
		IgM-APC-e710	1:400	II/41	eBioscience 46-5790-82
		IgG1-BV510	1:400	RMG1-1	BioLegend 406621
		IgG1-BV421	1:400	RMG1-1	Biolegend 406616
		IgG2a/b-APC	1:400	X-57	Miltenyi Biotec 130-117-523
		IgG2a/b-FITC	1:400	X-57	Miltenyi Biotec 130-119-149
		IgG2a/b-Biotin	1:200	X-57	Miltenyi Biotec 130-097-955
		IgA-FITC	1:400	RMA-1	Biolegend 11-4204-81
		IgA-Biotin	1:200	RMA-1	BioLegend 407004
		CD138-BV605	1:400	281-2	Biolegend 142516
		GL-7-AF647	1:400	GL7	BioLegend 144606
		CD196(CCR6)-AF647	1:400	29-2L17	BioLegend 129814
		IgMa	1:400	MA-69	BioLegend 408608
		IgMa	1:400	MA-69	BioLegend 408606
		T cell staining
		CD45.1-BV421	1:400	A20	BioLegend 110731
		CD45.1-APC	1:400	A20	BioLegend 110714
		CD45.2-PE	1:400	104	BioLegend 109808
		CD45.2-BV421	1:400	104	BioLegend 109831
		CD44(Pgp-1/Ly-24)-V500	1:600	IM7	BD Biosciences 560781
		CD62L-AF700	1:600	MEL-14	BioLegend 104426
		PD1-Percy7	1:400	29F.1A12	BioLegend 135216
		CXCR5-Biotin	1:200	L138D7	BioLegend 145510
		TCR Va2	1:400	B20.1	BioLegend 127810
		Streptavidin-APC-e780	1:400		Invitrogen 47-4317-82
		Streptavidin-AF 647	1:400		BioLegend 405237

## Sheet: table S2
eMBC_signature for comparation of Ccr6+ population in NALT and MedLN
Symbol
Plac8
S100a10
Lgals1
S100a6
Vim
Iglc1
Tmsb4x
Sub1
Dnajc7
Actg1
Bhlhe41
Ass1
Capg
Zeb2
Pycard
A530032D15Rik
Pld4
Cxcr3
Sp140
Gstt2
Gimap4
Ccdc28b
Sell
S100a11
Lsp1
Ighg2b
Psap
Evi2a
Marcks
Anxa6
Rilpl2
Ccr6
Actb
Stk38
Cd52
Ptms
1700048O20Rik
Cfp
Clic4
Mndal
Pml
Gapdh
Gm15987
Gpx1
Ifi27l2a
Cbfa2t3
Gimap7
Itgb1
Gdi2
Pdlim1
Zbtb32
Cib1
Ncf4
Rplp0
Serpinb1a
Myo1g
Gpr34
Hmgn3
Ncf1
Rassf4
Mxd4
Psmd8
Cmah
Bcl2a1b
Glipr1
St3gal6
Twf2
Cd36
Spn
Klf2
Rps2
Ahnak
Fgd2
Rpl41
Npc2
Ctsc
Fcgr2b
Gimap5
Ifi203
Napsa
Stoml1
Man2b1
Ddt
Tmsb10
Flna
Gm2a
Ddit4
Myo1f
Tm6sf1
Atxn1
Rpl28
Itga4
Hsp90ab1
Ech1
Cyth4
Slpi
Gpcpd1
Id2
Rps27a
Pglyrp1
Slc25a4
Serpinb6b
C130026I21Rik
Rasgrp2
Kcnn4
Batf
Phf11b
Unc119
Slc25a19
Eef1b2
Ifngr1
Ptpn22
Wdr26
Scd2
Tmem131
Ckap4
Pkp3
Arid3a
Ctsb
Ercc6l2
Tmem173
Rpl10a
Gpr137b
Asnsd1
Pdia4
Ebp
Hspa8
BC028528
Prelid1
Rpl3
Ly6a
