# Supplementary material for: The origins of IgA-secreting cells in the acinar structures of the nasal turbinates
Source: Research Square preprint supplement (doi:10.21203/rs.3.rs-3690682/v1), 2023-12-15
Supplement: Supplementary file 1 [file f196cf0404ea65b5b6de0c65.pdf]

## **The origins of IgA-secreting cells in the acinar structures of the nasal turbinates**

Jingjing Liu<sup>1</sup>, Liat Stoler-Barak<sup>1</sup>, Hadas Hezroni-Bravyi<sup>1</sup>, Adi Biram<sup>1</sup>, Sacha Lebon<sup>2</sup>, Natalia Davidzohn<sup>2</sup>, Merav Kedmi<sup>3,4</sup>, Muriel Chemla<sup>3,4</sup>, David Pilzer<sup>3,4</sup>, Marina Cohen<sup>5</sup>, Ori Brenner<sup>5</sup>, Moshe Biton<sup>2</sup> and Ziv Shulman<sup>1,6,\*</sup>

### **Extended information**

**Extended data Figure 1.** NALT hosts commensal-driven chronic germinal centers.

**Extended data Figure 2.** Single-cell RNA sequence analysis of NALT and MedLN-derived antigen-specific B cells.

**Extended data Figure 3.** B cell expansion in the SED of the NALT depends on interactions with T cells.

**Extended data Figure 4.** Antigen-specific B cell home to the nasal turbinate from the NALT.

**Extended data Figure 5.** Olfactory epithelium anatomy.

### **Videos:**

**Extended data Video 1.** LSM images of NALT at day 5 following i.n. NP-OVA.

**Extended data Video 2.** LSM images of NALT at day 10 following i.n. NP-OVA.

**Extended data Video 3.** Dynamics of GFP<sup>+</sup> B1-8<sup>hi</sup> B cell response within the NALT at day 0 to 30 following i.n. NP-OVA.

### **Tables:**

**Table 1.** Antibodies used in flow cytometry.

**Table 2.** eMBC\_signature for comparison of Ccr6<sup>+</sup> population in NALT and MedLN.

## Extended Data Figure 1

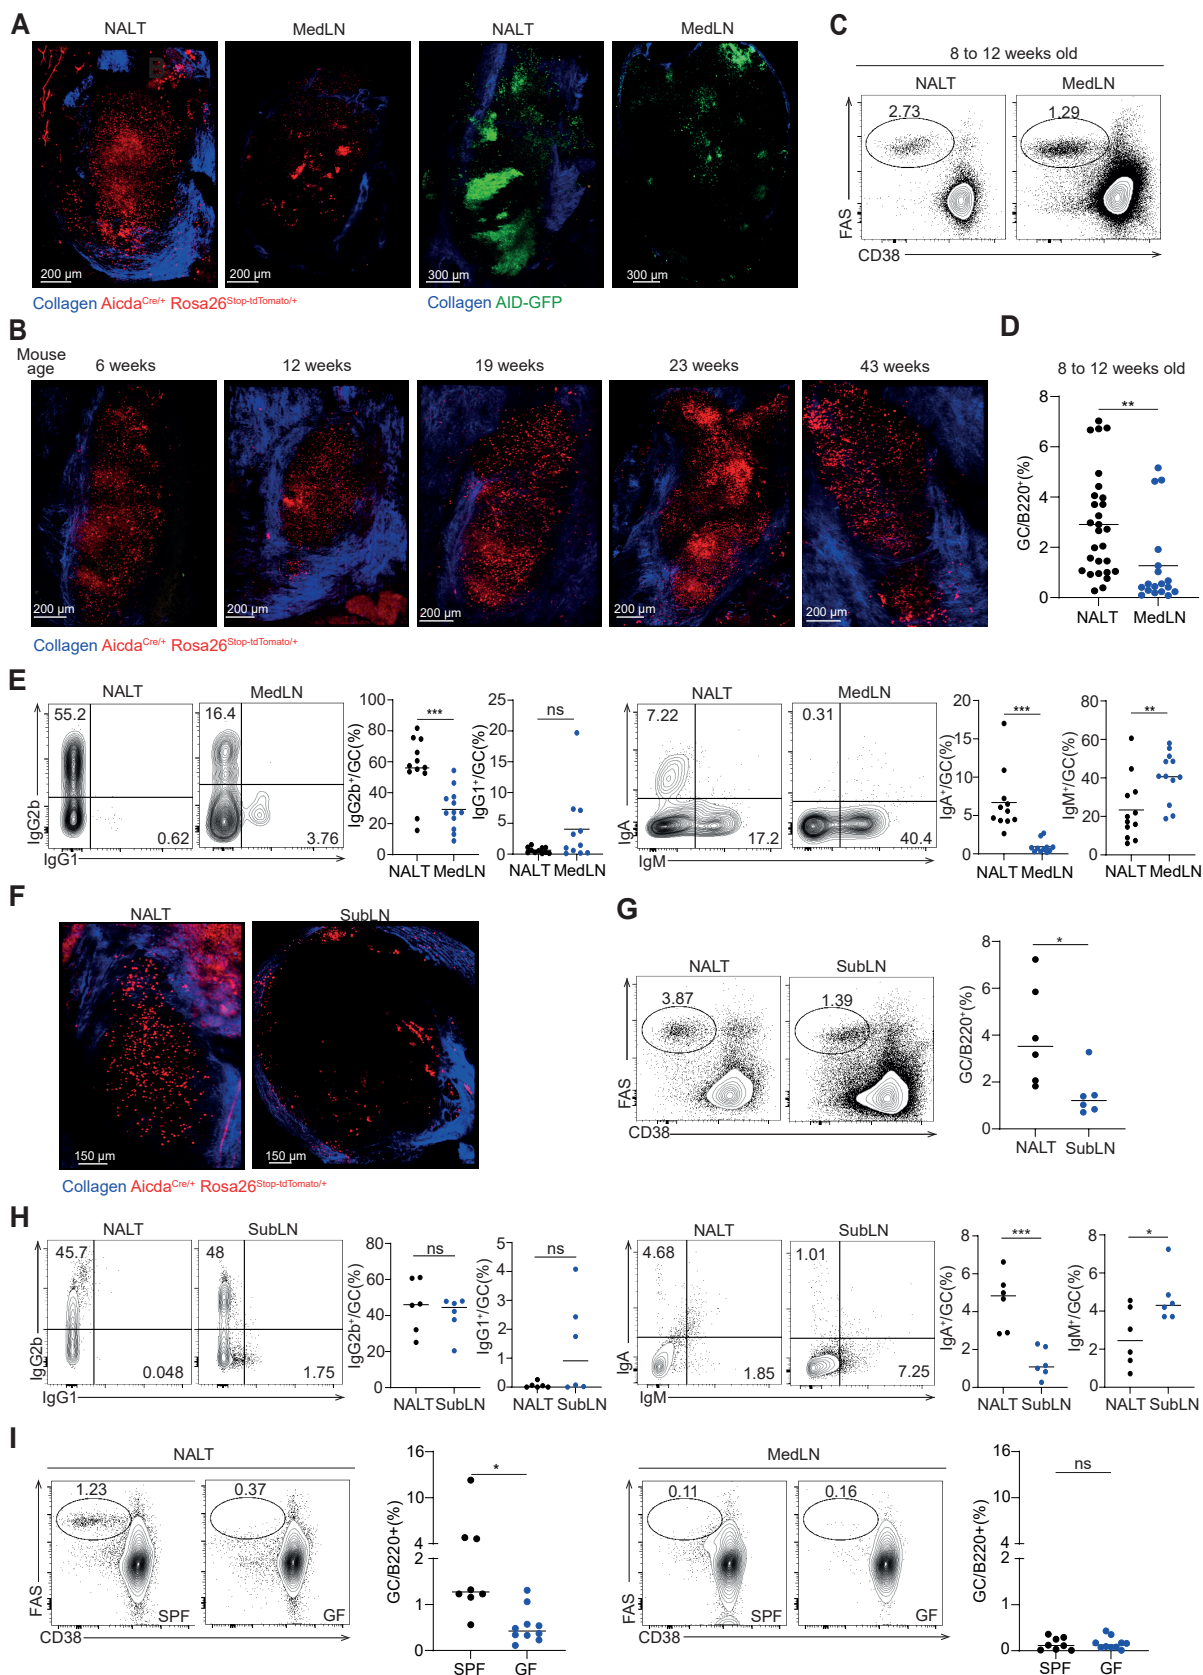



**Extended Data Fig. 1: NALT hosts commensal-driven chronic germinal centers.**

(A B) Representative TPLSM images of NALT and MedLN. (A) LNs derived from naïve *Aicda*<sup>Cre/+</sup> *Rosa26*<sup>Stop-tdTomato/+</sup> mice (left) or AID-GFP<sup>+</sup> (right) mice. Scale bars, 200μm, 300 μm. n= 4-5, 7 independent experiments. (B) NALT derived from 6 weeks to 43 weeks old *Aicda*<sup>Cre/+</sup> *Rosa26*<sup>Stop-tdTomato/+</sup> mice. Scale bars, 200μm. n=1-3, 3 independent experiments. (C D) Representative plots and quantification of GC B cells from NALT and MedLN. LNs derived from naïve C57BL/6 SPF mice. B220<sup>+</sup> population gated from the CD45<sup>+</sup> compartment; FAS<sup>+</sup> CD38<sup>-</sup> GC population gated from the B220<sup>+</sup> compartment. For NALT, n=28, mean of GC (%)=2.908, SEM=0.3893; for MedLN, n=18, mean of GC (%)=1.27, SEM=0.4006; data pool from 9 independent experiments. (E) NALT and MedLN cells derived from naïve C57BL/6 SPF mice. IgA<sup>+</sup>, IgG1<sup>+</sup>, IgG2ab<sup>+</sup> and IgM<sup>+</sup> population gated from FAS<sup>+</sup> CD38<sup>-</sup> B220<sup>+</sup> compartment. n=12; 4 independent experiments. (F) Representative TPLSM images of NALT and submandibular LN. LNs derived from naïve *Aicda*<sup>Cre/+</sup> *Rosa26*<sup>Stop-tdTomato/+</sup> mice. Scale bars, 150μm. n=3, 2 independent experiments. (G) Representative plots and quantification of GC B cells of NALT and submandibular LN. LNs derived from naïve C57BL/6 SPF mice. B220<sup>+</sup> population gated from the CD45<sup>+</sup> compartment; FAS<sup>+</sup> CD38<sup>-</sup> GC population gated from the B220<sup>+</sup> compartment. n=6, 2 independent experiments. (H) Representative plots and quantification of GC B cell isotypes. NALT and submandibular LN derived from naïve C57BL/6 SPF mice. IgA<sup>+</sup>, IgG1<sup>+</sup>, IgG2ab<sup>+</sup> and IgM<sup>+</sup> population gated from the FAS<sup>+</sup> CD38<sup>-</sup> B220<sup>+</sup> compartment. n=6; 2 independent experiments. (I) Comparison of GC B cell population between naïve SPF and GF mice. FAS<sup>+</sup> CD38<sup>-</sup> GC population gated from the B220<sup>+</sup> compartment. n=8-10; 2 independent experiments.

## Extended Data Figure 2

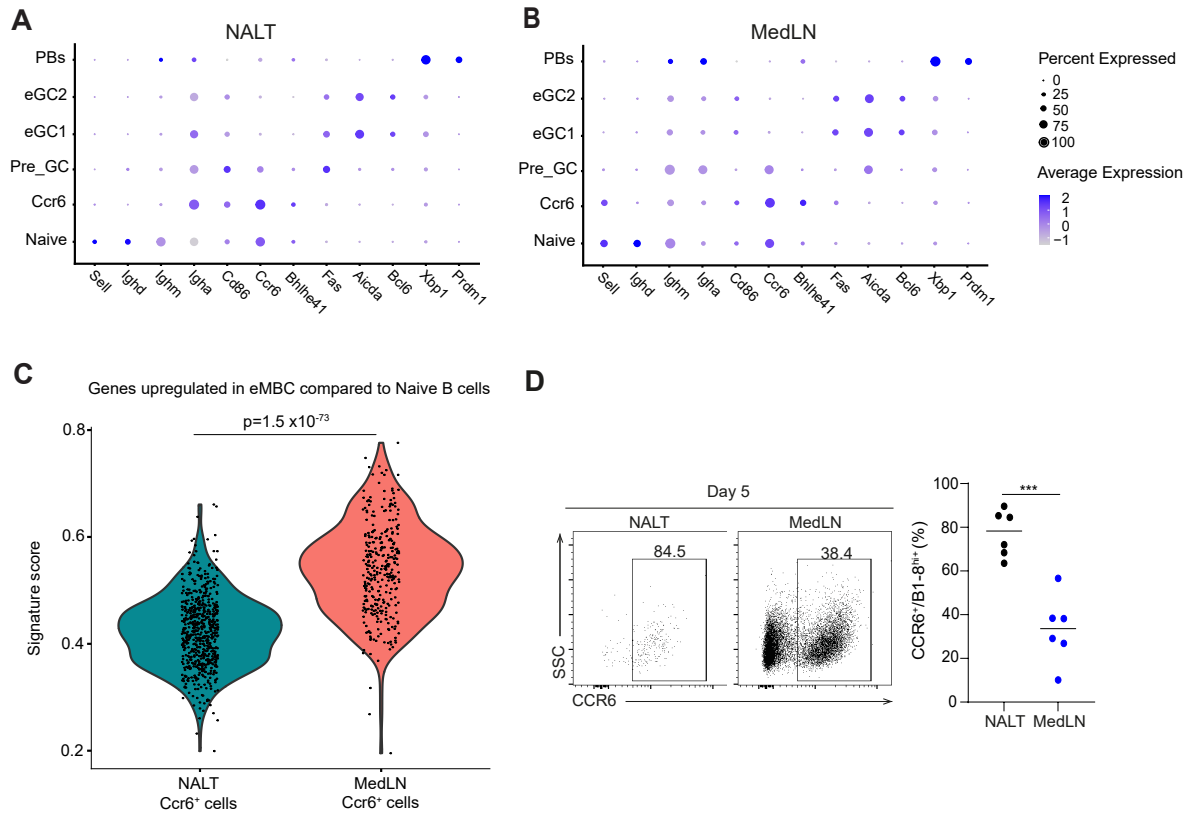

**Extended Data Fig. 2: Single-cell RNA sequence analysis of NALT and MedLN-derived antigen-specific B cells.**

(A, B) Two-dimensional embedding as in (Fig. 1 I) colored to represent the weight of genes associated with distinct cell clusters. Single-cell RNA-seq of transferred GFP<sup>+</sup> B1-8<sup>hi</sup> B cells in the NALT and MedLN, 5 days after i.n. NP-OVA+MPLA. Data was pooled from 5 mice. (C) Violin plots of the distribution of genes upregulated in early memory B cells compared to naïve B cells, in Ccr6<sup>+</sup> cell cluster, either in the NALT or the MedLN. Data was pooled from 5 mice. (D) Representative flow cytometer plots and quantification of NALT and MedLN at day 5 following i.n. NP-OVA+MPLA. CCR6<sup>+</sup> population gated from the GFP<sup>+</sup> B220<sup>+</sup> CD138<sup>-</sup> B1-8<sup>hi</sup> B cells compartment. n=6; 3 independent experiments.

### Extended Data Figure 3

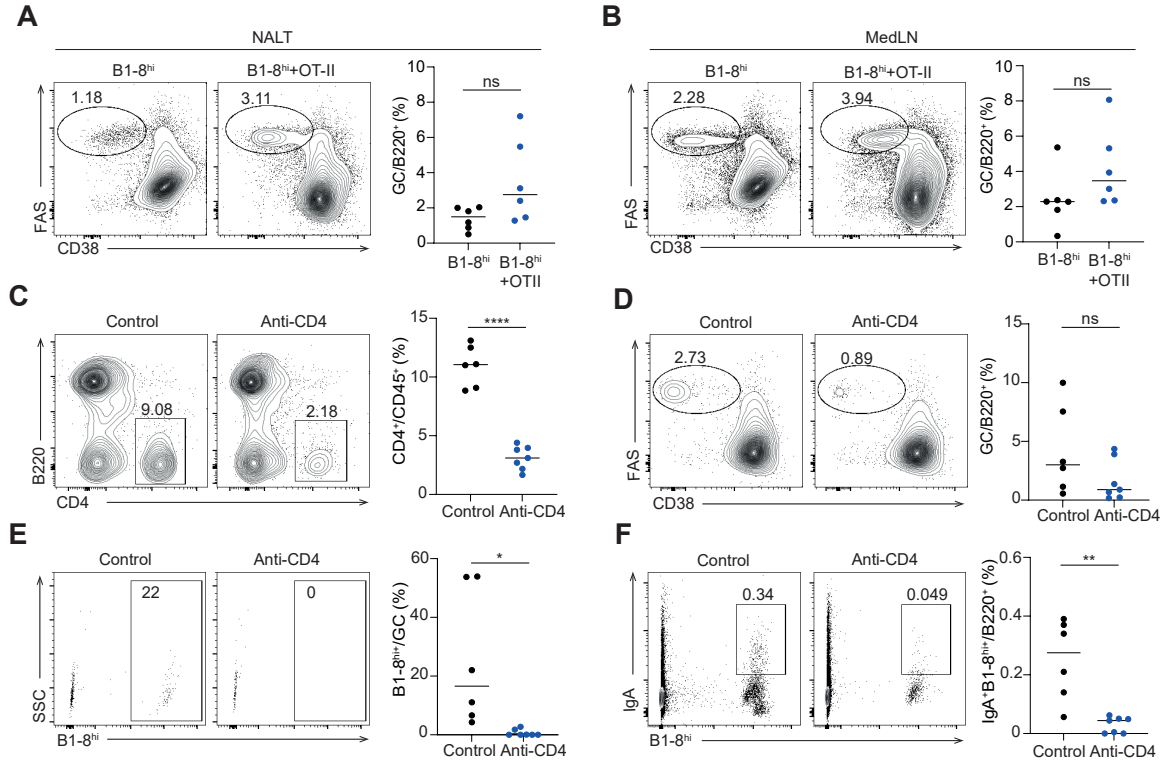

### Extended Data Fig. 3: B cell expansion in the SED of the NALT depends on interactions with T cells.

(A, B) Representative plots and quantification of NALT (A) and MedLN (B) at day 7 following i.n. NP-OVA+MPLA with or without injection of CD4<sup>+</sup> OT-II T cells. FAS<sup>+</sup> CD38<sup>-</sup> GC population gated from the B220<sup>+</sup> compartment. n=6; 2 independent experiments. (C-F) Host mice were injected with anti-CD4 antibody while transferring GFP<sup>+</sup> B1-8<sup>hi</sup> B cells (same procedure as Fig. 2 G). (C) Flow cytometry analysis of CD4<sup>+</sup> T cells in NALT at day 7 following NP-OVA intranasal boost. CD4<sup>+</sup> T cell population gated from CD45<sup>+</sup> compartment. n= 6-7; 2 independent experiments. (D-F) Flow cytometry quantification of B cells in NALT at day 7 following NP-OVA intranasal boost. For D, FAS<sup>+</sup> CD38<sup>-</sup> GC population gated from B220<sup>+</sup> compartment; for E, GFP<sup>+</sup> B1-8<sup>hi</sup> population gated from FAS<sup>+</sup> CD38<sup>-</sup> GC compartment; for F, IgA<sup>+</sup> GFP<sup>+</sup> B1-8<sup>hi</sup> B cell population gated from B220<sup>+</sup> compartment; n= 6-7; 2 independent experiments.

## Extended Data Figure 4

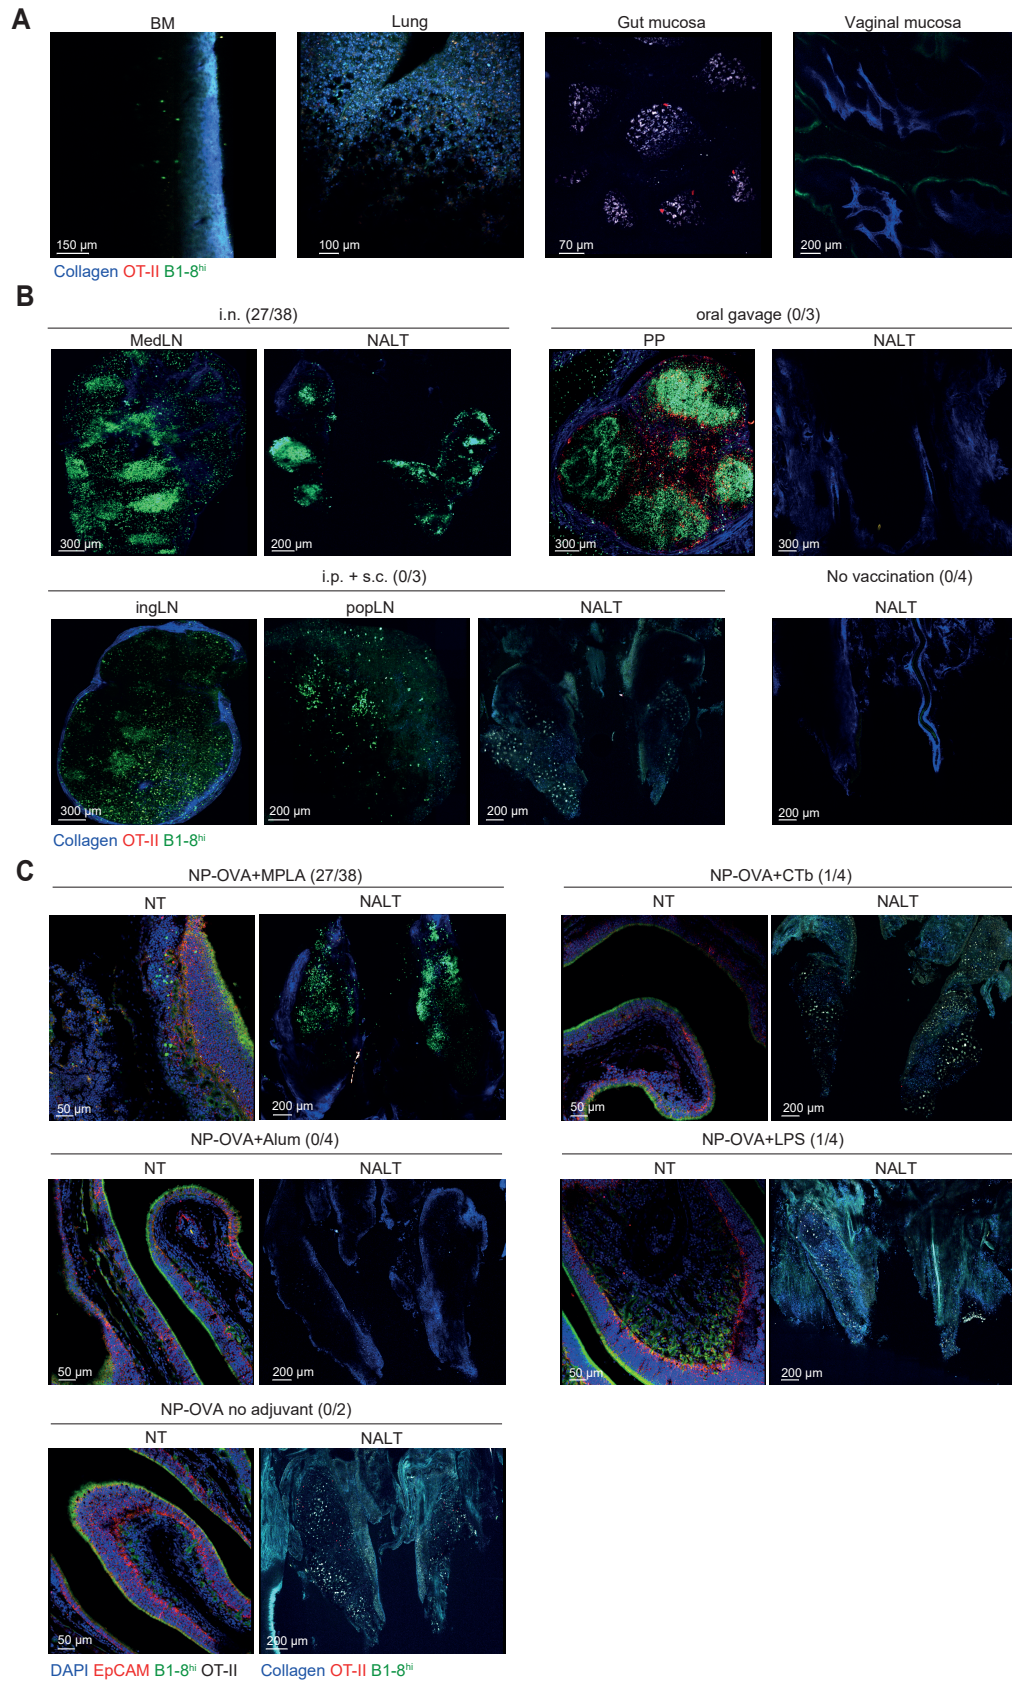

**Extended Data Fig. 4: Antigen-specific B cell home to the nasal turbinate from the NALT.**

(A) Representative TPLMS images of GFP<sup>+</sup> B1-8<sup>hi</sup> B cells in different tissues at day 7 post i.n. NP-OVA+MPLA boost. Tissues derived from WT host mice were adoptively transferred with GFP<sup>+</sup> B1-8<sup>hi</sup> B cells and Rosa26<sup>tdTomato/+</sup> CD4<sup>+</sup> OT-II T cells following i.n. prime and boost immunizations. Scale bars, 70-200μm. (B) Representative TPLMS images of the LNs after different vaccine strategies. i.n.: NP-OVA+MPLA i.n. prime and boost; i.p.+s.c.: NP-OVA+Alum i.p. prime and NP-OVA+MPLA s.c. boost; oral gavage with NP-CT. (C) Representative confocal images of the NT and TPLMS images of the NALTs after vaccination with NP-OVA in different nasal adjuvants. (27/38): 27 mice detected NT-homing GFP<sup>+</sup> B1-8<sup>hi</sup> B cells out of 38 tested.



## Extended Data Figure 5

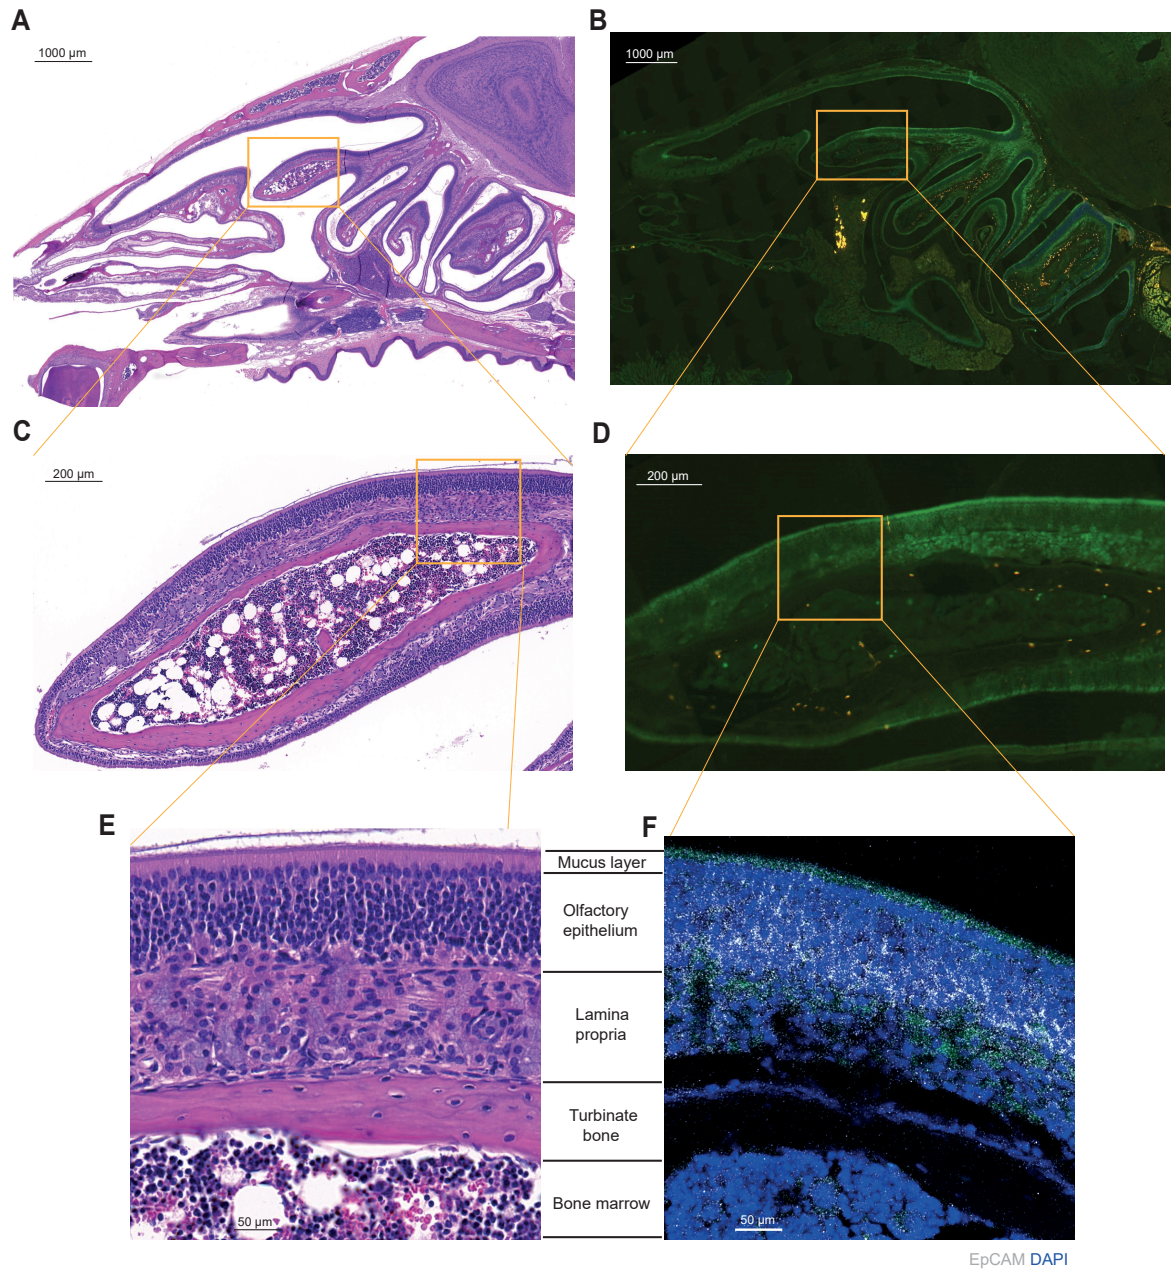

### Extended Data Fig. 5. Olfactory epithelium anatomy.

(A, C, E) Anatomy of the NT. Sagittal section of the nasal turbinate of a naïve mouse (8 weeks old) with H&E staining. (B, D, F) Representative digital slide scanner and confocal images of the nasal turbinate of naïve *Aicda*<sup>Cre/+</sup> *Rosa26*<sup>Stop-tdTomato/+</sup> *Blimp1*-YFP<sup>+</sup> mice. n=4, 2 independent experiments.
